# Supplementary material for: The Mediterranean, Dietary Approaches to Stop Hypertension (DASH), and Mediterranean-DASH Intervention for Neurodegenerative Delay (MIND) Diets Are Associated with Less Cognitive Decline and a Lower Risk of Alzheimer's Disease—A Review
Source: PubMed Central journal article supplement — Adv Nutr. 2019 Jun 18;10(6):1040–65. doi: 10.1093/advances/nmz054 (PMC6855954; doi:10.1093/advances/nmz054), 2019-06-18
Supplement: nmz054_supplemental_file.pdf [file nmz054_supplemental_file.pdf]

Supplemental TABLE 1 Search strategy

| Search no. | OVID Medline until 27 March 2019                                                                                                    | Search results |
|------------|-------------------------------------------------------------------------------------------------------------------------------------|----------------|
| 1          | COGNITION DISORDERS/ or COGNITION/                                                                                                  | 143284         |
| 2          | cognitive decline.mp.                                                                                                               | 18881          |
| 3          | Dementia/ or Alzheimer Disease/                                                                                                     | 125301         |
| 4          | Dementia, Vascular/                                                                                                                 | 4694           |
| 5          | MEMORY, SHORT-TERM/ or MEMORY/ or MEMORY, EPISODIC/ or MEMORY DISORDERS/ or MEMORY, LONG-TERM/                                      | 101942         |
| 6          | cognitive impairment.mp.                                                                                                            | 50485          |
| 7          | Diet, Mediterranean/                                                                                                                | 2827           |
| 8          | DASH.mp.                                                                                                                            | 5919           |
| 9          | MIND.mp.                                                                                                                            | 52691          |
| 10         | DIET/                                                                                                                               | 149340         |
| 11         | Dietary Approaches To Stop Hypertension/                                                                                            | 57             |
| 12         | Mediterranean-DASH Intervention for Neurodegenerative Delay.mp.                                                                     | 8              |
| 13         | 8 and 10                                                                                                                            | 255            |
| 14         | 9 and 10                                                                                                                            | 161            |
| 15         | 1 or 2 or 3 or 4 or 5 or 6                                                                                                          | 357876         |
| 16         | 7 or 11 or 12 or 13 or 14                                                                                                           | 3256           |
| 17         | 15 and 16                                                                                                                           | 196            |
| 18         | Limit to English language and limit to publication types that are no commentaries, editorials, letters, news, or newspaper articles | 163            |
